# Supplementary material for: Correlation of Cerebral Microbleed Distribution to Amyloid Burden in Patients with Primary Intracerebral Hemorrhage
Source: PubMed Central journal article supplement (PMC5356186; doi:10.1038/srep44715), 2017-03-17
Supplement: srep44715-s1.pdf [file srep44715-s1.pdf]

# **Correlation of Cerebral Microbleed Distribution to Amyloid Burden in Patients with Primary Intracerebral Hemorrhage**

Hsin-Hsi Tsai, MD<sup>1</sup>; Li-Kai Tsai, MD, PhD<sup>1</sup>; Ya-Fang Chen, MD<sup>2</sup>; Sung-Chun Tang, MD, PhD<sup>1</sup>; Bo-Ching Lee, MD<sup>2</sup>; Ruoh-Fang Yen, MD, PhD<sup>3</sup>; Jiann-Shing Jeng, MD, PhD<sup>1</sup>

<sup>1</sup> Departments of Neurology, National Taiwan University Hospital, Taipei, Taiwan

<sup>2</sup> Department of Medical Imaging, National Taiwan University Hospital, Taipei, Taiwan

<sup>3</sup> Department of Nuclear Medicine, National Taiwan University Hospital, Taipei, Taiwan

## **Supplementary Figure Legends**

### **Supplementary Figure 1 Correlation of lobar cerebral microbleed count and amyloid burden**

The correlation of lobar cerebral microbleed (CMB) count to the global PiB standardized uptake value ratio (SUVR) (A), frontal PiB SUVR (B) and occipital PiB SUVR (C).

### **Supplementary Figure 2 Correlation of deep cerebral microbleed count and amyloid burden**

The correlation of deep cerebral microbleed (CMB) count to the global PiB standardized uptake value ratio (SUVR) (A), frontal PiB SUVR (B) and occipital PiB SUVR (C).

**Supplementary Table 1: Comparison of other image markers in patients with different CMB pattern**

|                                              | <b>Lobar (n=8)</b> | <b>Mixed (n=28)</b> | <b>Deep (n=11)</b> | <b><i>p</i> value</b> |
|----------------------------------------------|--------------------|---------------------|--------------------|-----------------------|
| White matter score                           | 1.88 ± 0.84        | 2.18 ± 0.72         | 1.82 ± 0.75        | 0.320                 |
| Cortical superficial siderosis               | 3 (37.5%)          | 3 (10.7%)           | 0 (0%)             | 0.064                 |
| Enlarged perivascular space<br>(number > 20) |                    |                     |                    |                       |
| Centrum Semiovale                            | 2 (25%)            | 18 (64.3%)          | 4 (36.4%)          | 0.102                 |
| Basal ganglia                                | 2 (25%)            | 6 (21.4%)           | 5 (45.5%)          | 0.385                 |

Values are mean (±standard deviation) or number (percentage).

**Supplementary Table 2: Results of Logistic regression for Positive PiB Scan (SUVR>1.15)**

|                    | <b>Odds Ratio</b> | <b>95% CI</b>       | <b>p value</b> |
|--------------------|-------------------|---------------------|----------------|
| Age $\geq$ 55      | 5.258             | 0.416-66.409        | 0.200          |
| Hypertension       | 1.135             | 0.149-8.671         | 0.903          |
| Days after ICH     | 1.000             | 0.999-1.001         | 0.844          |
| Lobar ICH          | 0.052             | 0.002-1.001         | 0.068          |
| Strictly lobar CMB | 0.000             | 0.000-1.699         | 0.051          |
| CMB count          |                   |                     |                |
| Lobar              | 0.968             | 0.880-1.065         | 0.507          |
| Deep               | 1.056             | 0.960-1.161         | 0.261          |
| <b>CMB ratio*</b>  | <b>6.018</b>      | <b>1.043-34.719</b> | <b>0.045</b>   |

CMB: cerebral microbleed; CI: Confidence interval; ICH: intracerebral hemorrhage;

PiB:  $^{11}\text{C}$ -Pittsburgh Compound B; SUVR: standardized uptake value ratio.

\*CMB ratio is defined as the lobar CMB count divided by the deep CMB count.

**Supplementary Figure 1**

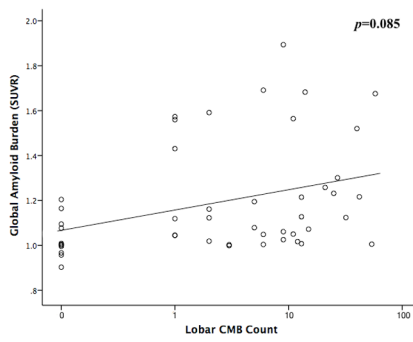

(A)

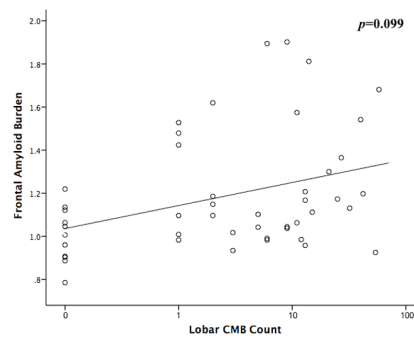

(B)

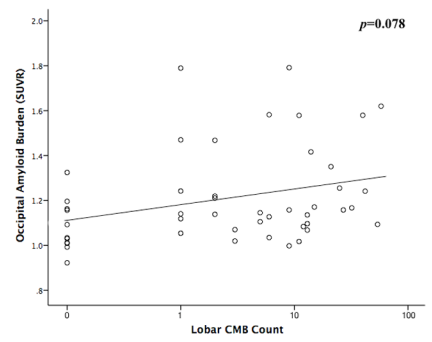

(C)

**Supplementary Figure 2**

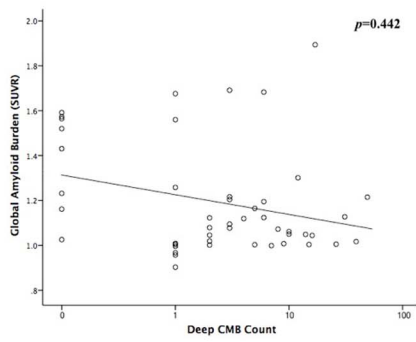

(A)

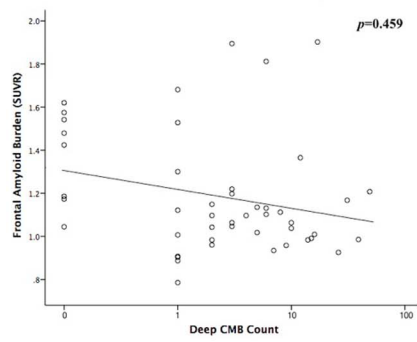

(B)

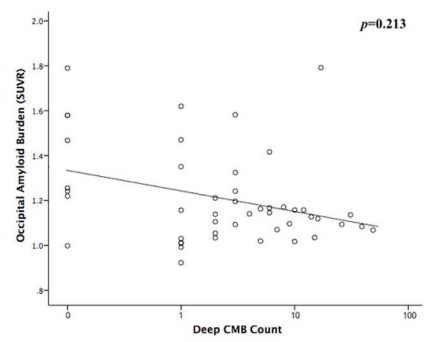

(C)
